# Supplementary material for: Chloroquine Suppresses Effector B-Cell Functions and Has Differential Impact on Regulatory B-Cell Subsets
Source: Frontiers journal article supplement (doi:10.3389/fimmu.2022.818704), 2022-02-08
Supplement: Image_1.PDF [file Image_1.PDF]

S1

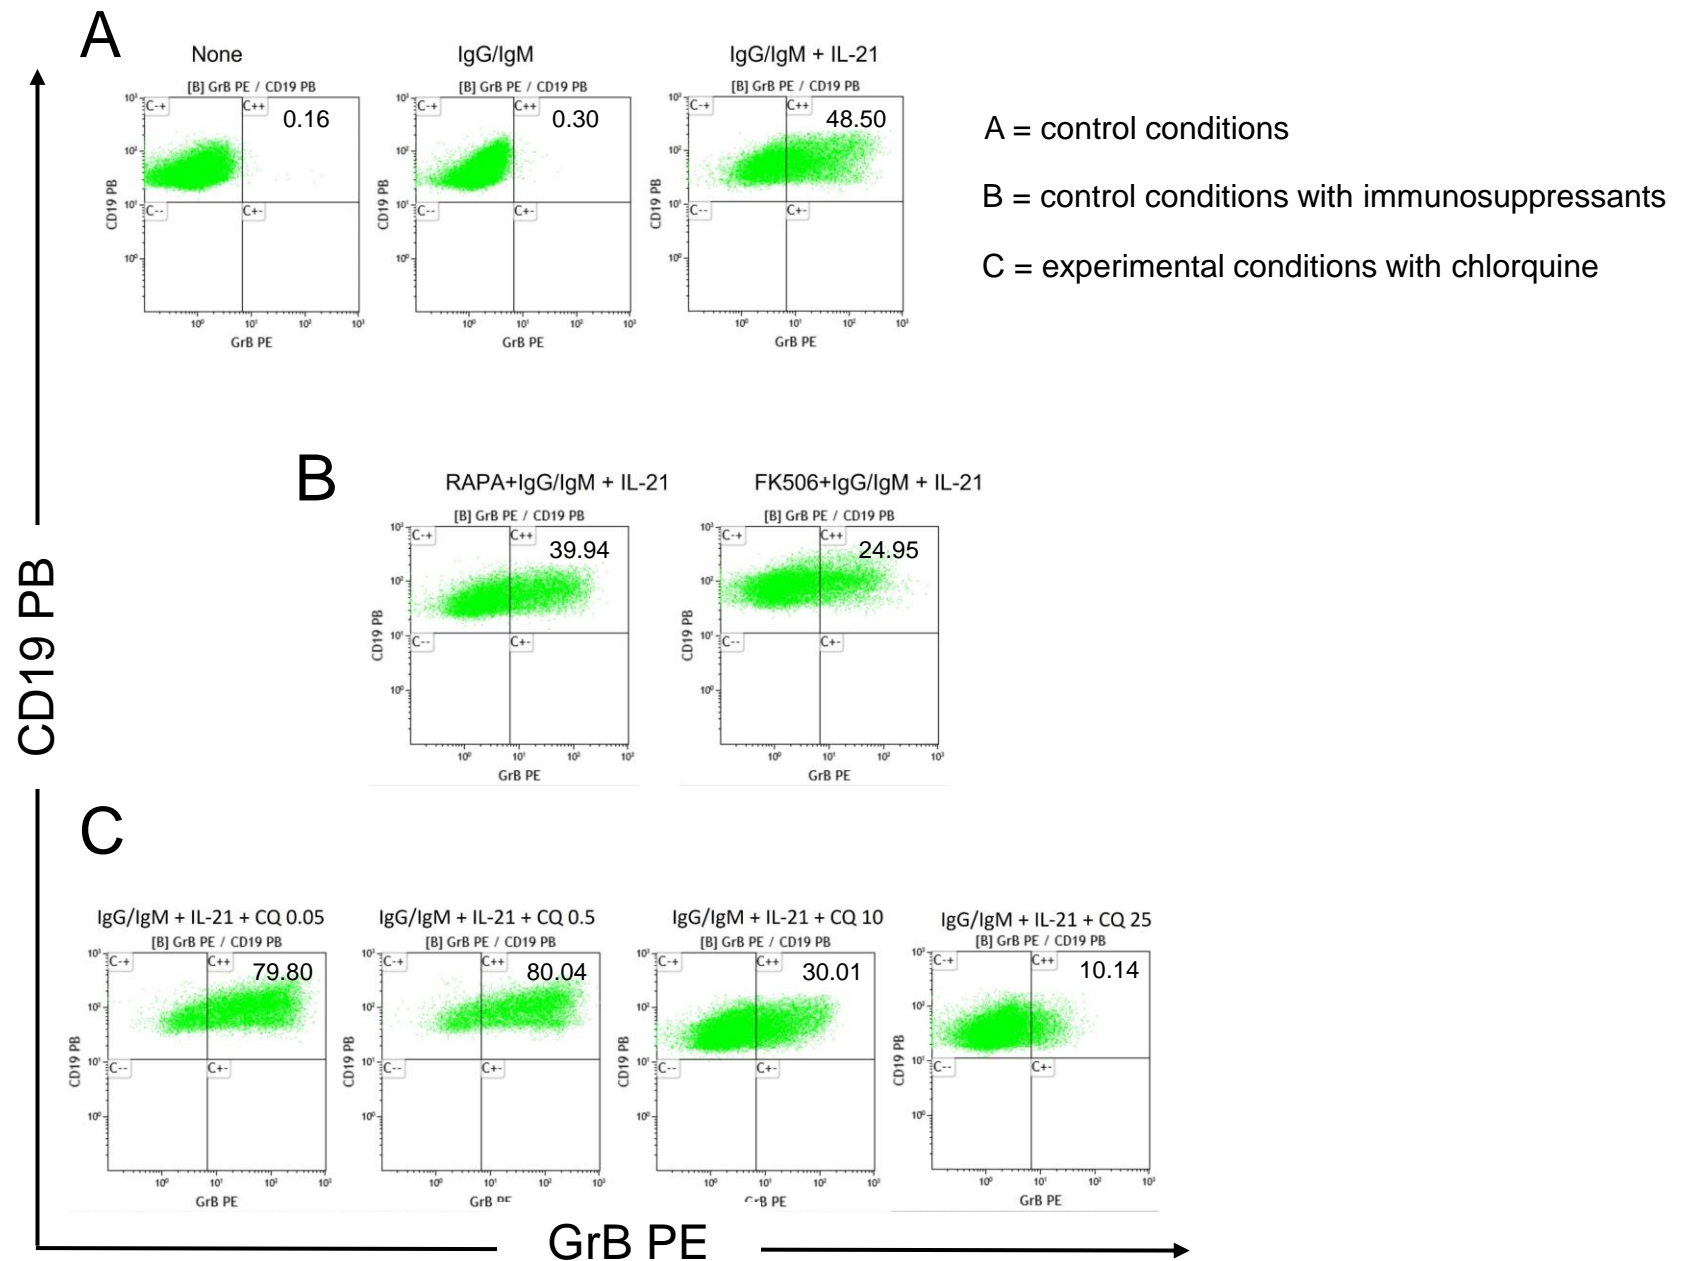

**Figure S1. Effect of CQ on GrB producing regulatory B-cells: Representative flow cytometric data.**

S2

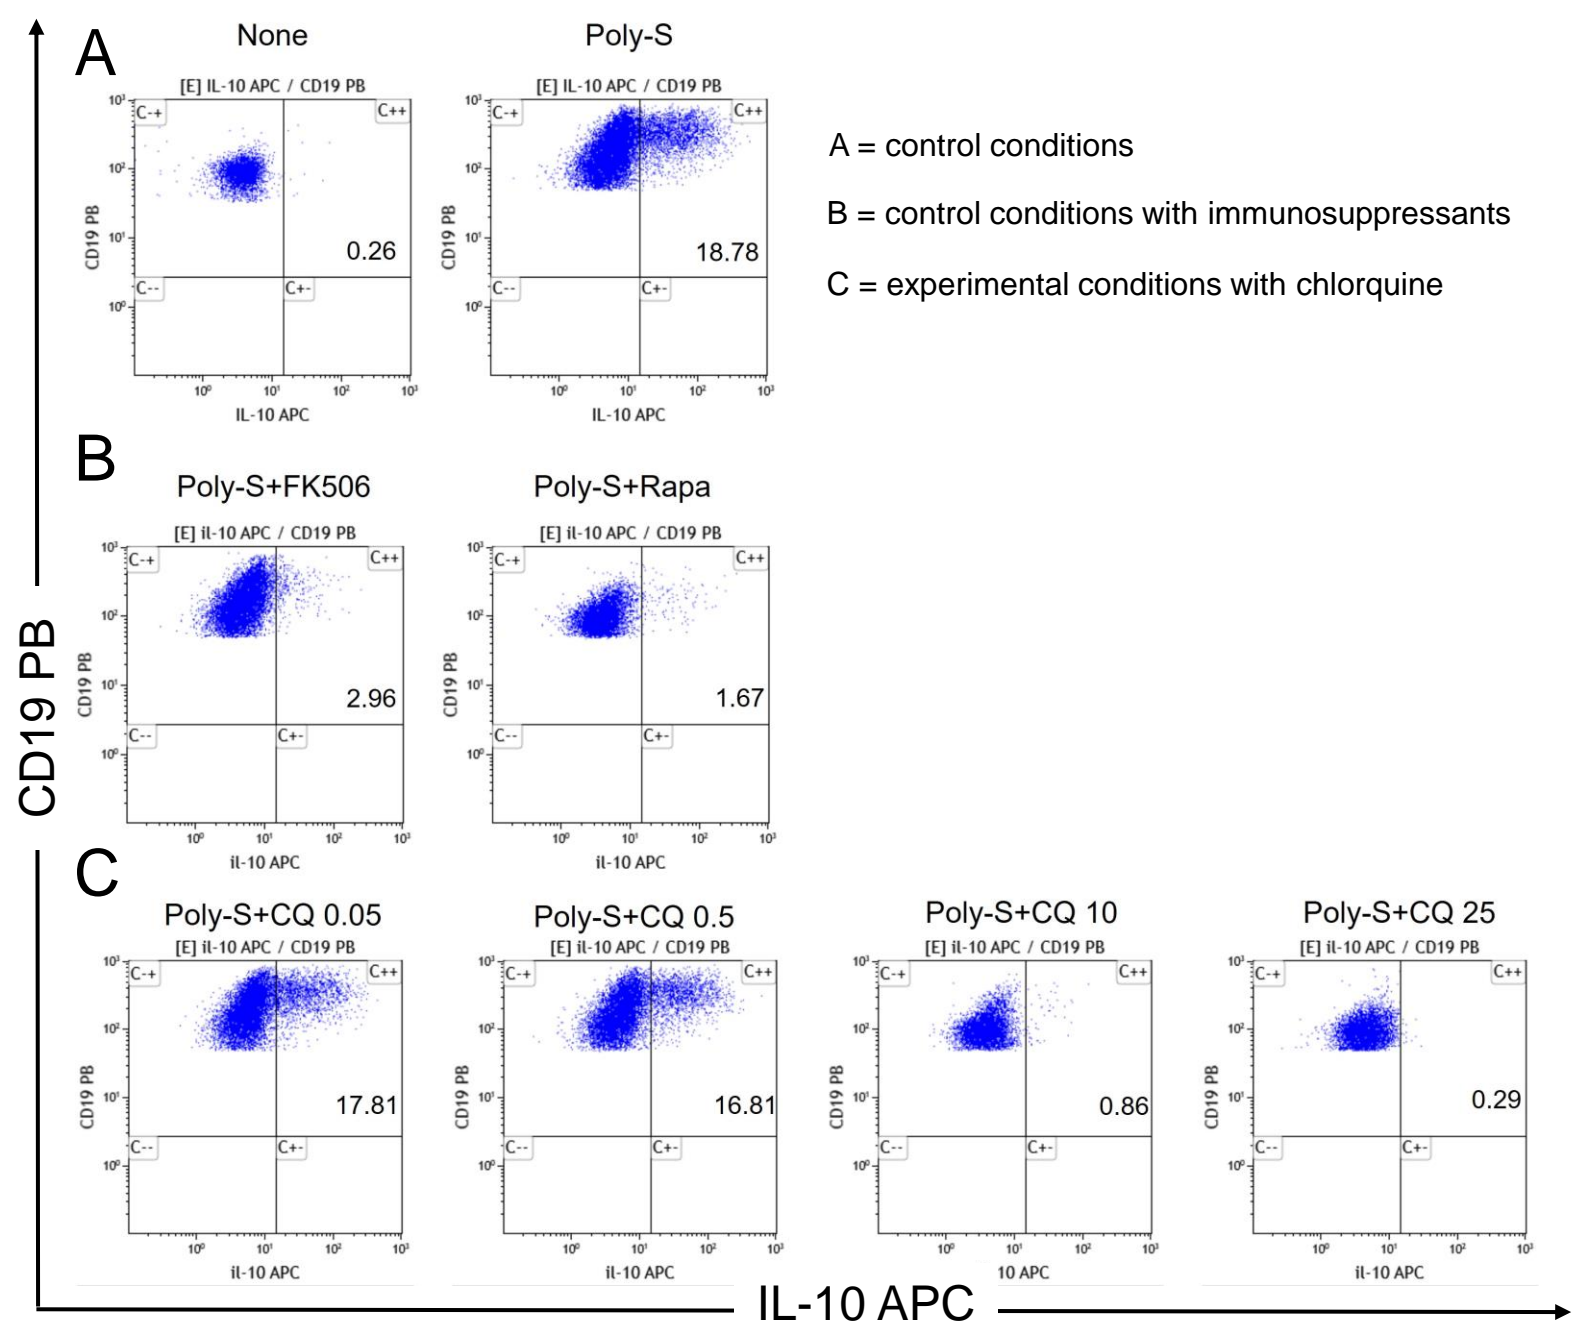

**Figure S2. Effect of CQ on IL-10 producing regulatory B-cells: Representative flow cytometric data.**

S3

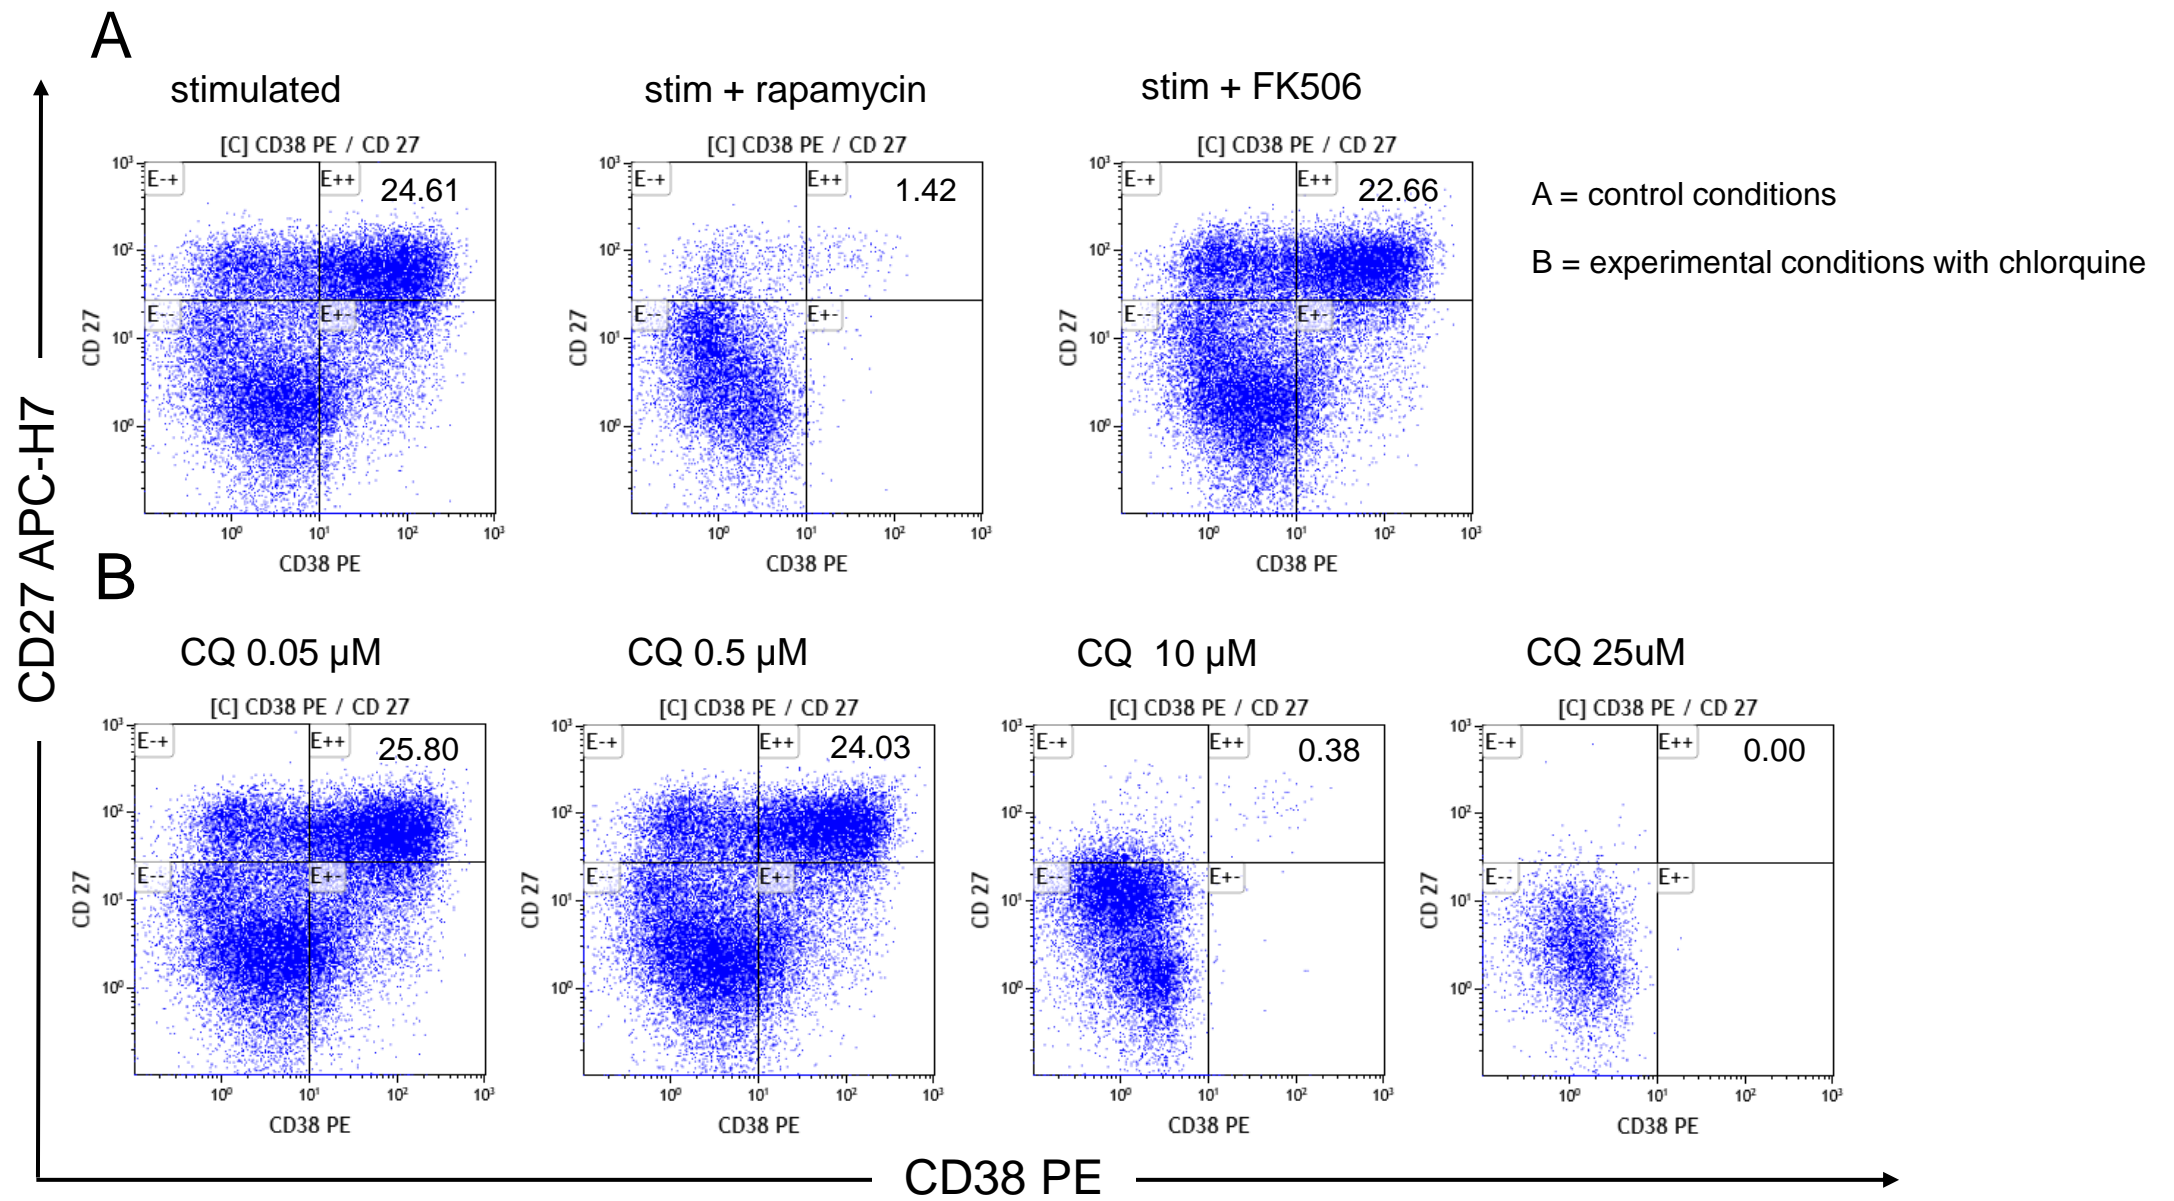

**Figure S3. Effect of CQ on plasma blast formation of B-cells: Representative flow cytometric data.**
